# Supplementary material for: A Protected Area Connectivity Evaluation and Strategy Development Framework for Post-2020 Biodiversity Conservation
Source: MDPI journal article supplement (doi:10.3390/land11101670), 2022-09-27
Supplement: s1 [file s1]

## Supplementary Materials

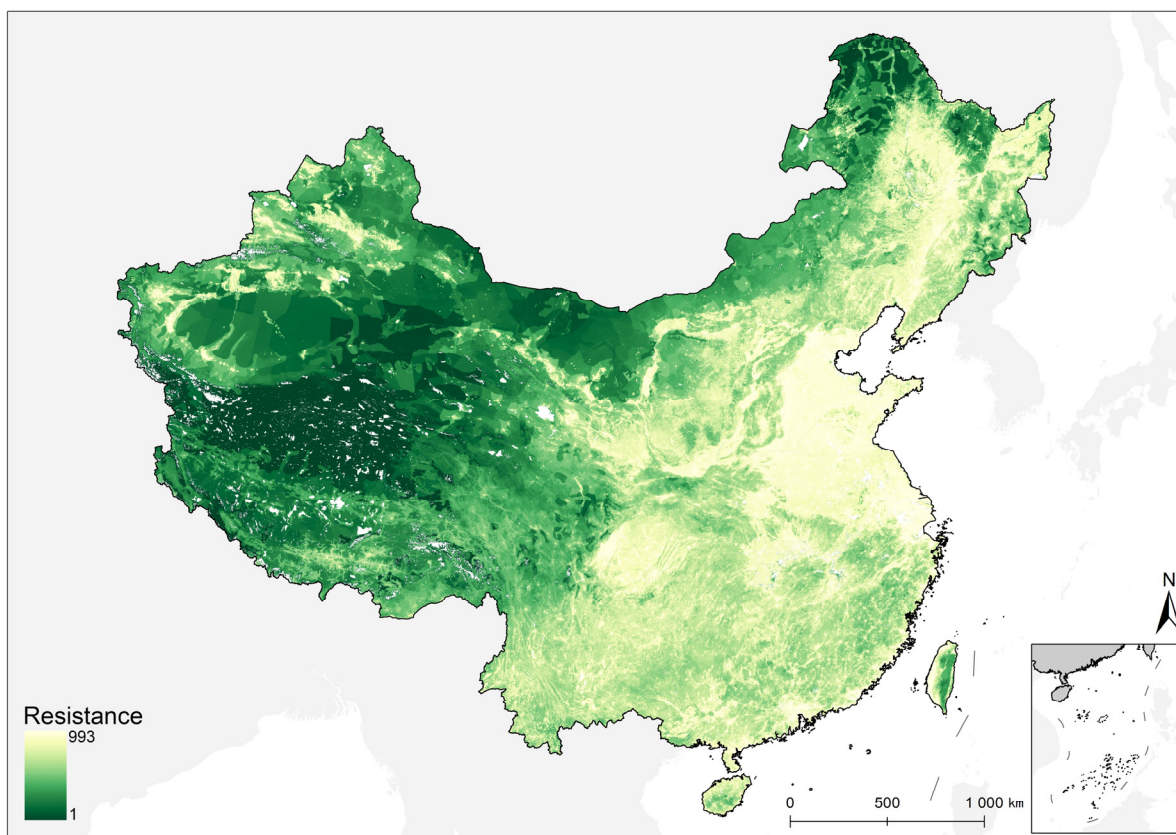

Figure S1. Resistance Surface of China.

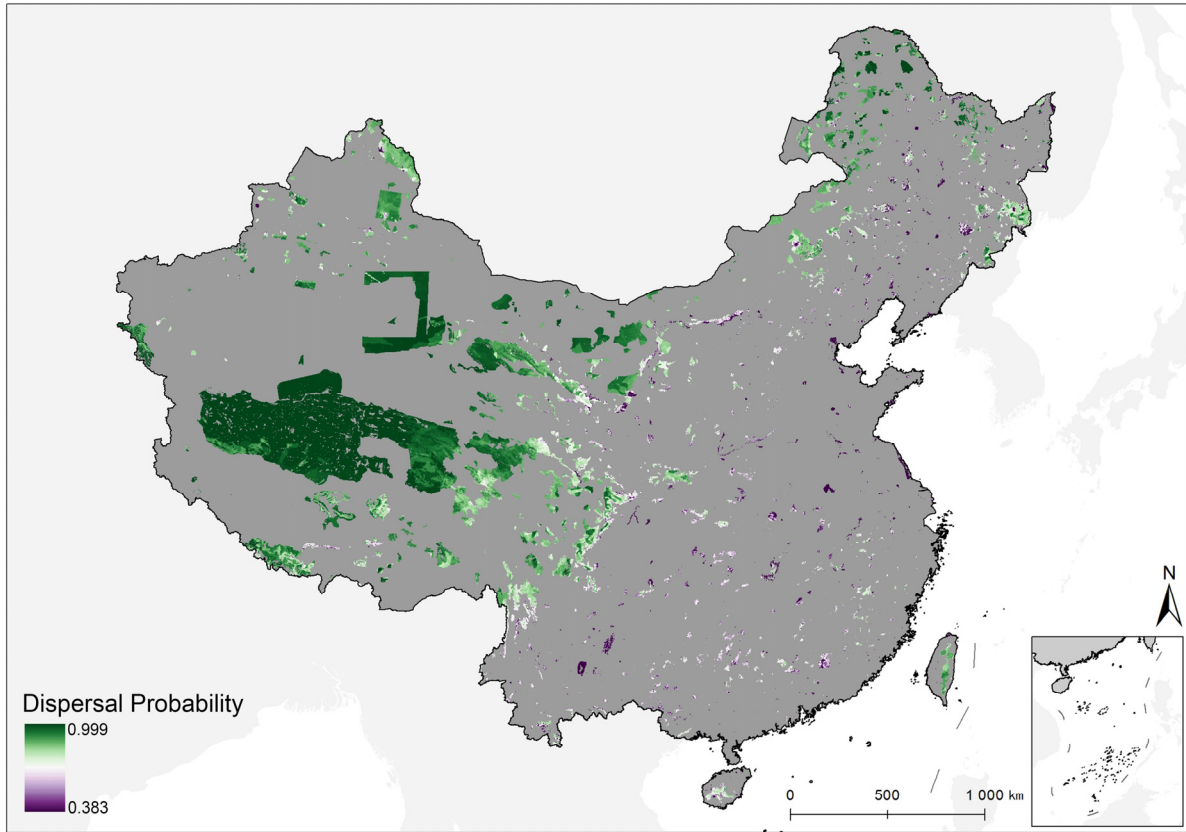

Figure S2. Dispersal Probability Surface of PAs in China.

Table S1. Connectivity indicators of ecoregions' PA network in China under the assumption that the intra-patch connectivity of PA patches is very good, that is, the PC<sub>intra</sub> index of all the PA patches is 1.

| No. | Ecoregion                                                            | PC <sub>net</sub><br>of PAs | PC <sub>land</sub><br>of PAs |
|-----|----------------------------------------------------------------------|-----------------------------|------------------------------|
| I1  | Northern Daxing'anling cold-temperate semi-humid zone                | 75.30%                      | 11.41%                       |
| I2  | Southern Daxing'anling temperate semi-humid zone                     | 28.25%                      | 4.05%                        |
| I3  | Xiaoxing'anling temperate semi-humid zone                            | 71.07%                      | 12.05%                       |
| I4  | Northeast Plain temperate semi-humid zone                            | 10.35%                      | 0.52%                        |
| I5  | Changbai Mountain temperate humid semi-humid zone                    | 21.21%                      | 3.21%                        |
| I6  | Liaodong Peninsula warm-temperate semi-humid zone                    | 8.94%                       | 0.45%                        |
| II1 | Yanshan Mountain warm-temperate semi-humid zone                      | 10.33%                      | 0.48%                        |
| II2 | Haihe Plain warm-temperate semi-humid zone                           | 22.36%                      | 0.57%                        |
| II3 | Shanxi Plateau warm-temperate semi-humid zone                        | 10.74%                      | 0.31%                        |
| II4 | Northern Shaanxi and Longzhong Plateau warm-temperate semi-arid zone | 18.35%                      | 0.52%                        |
| II5 | Southern Taihang and northern Qinling warm-temperate semi-humid zone | 18.71%                      | 0.77%                        |
| II6 | Yellow and Huai River Plain warm-temperate semi-humid zone           | 19.44%                      | 0.54%                        |

|       |                                                                           |        |        |
|-------|---------------------------------------------------------------------------|--------|--------|
| II7   | Shandong Peninsula warm-temperate semi-humid zone                         | 14.58% | 0.25%  |
| III1  | Middle and lower reaches of Yangtze River northern subtropical humid zone | 13.49% | 0.58%  |
| III2  | Middle and lower reaches of Yangtze River central subtropical humid zone  | 6.00%  | 0.27%  |
| III3  | Southeast China humid south subtropical zone                              | 6.74%  | 0.26%  |
| III4  | Taiwan Island tropical subtropical humid zone                             | 89.71% | 17.63% |
| III5  | Southeast China tropical humid zone                                       | 44.54% | 1.19%  |
| III6  | Hainan Island tropical humid zone                                         | 86.93% | 14.45% |
| IV1   | Qinba Mountains northern subtropical humid zone                           | 31.65% | 4.56%  |
| IV2   | Sichuan basin and marginal mountains subtropical humid zone               | 56.66% | 6.66%  |
| IV3   | Guizhou plateau and marginal mountains subtropical humid zone             | 9.34%  | 0.34%  |
| IV4   | Northern Transverse Mountains subtropical humid semi-humid zone           | 24.53% | 3.81%  |
| IV5   | Southern Transverse Mountains central subtropical humid zone              | 20.78% | 2.16%  |
| IV6   | Southwest China tropical subtropical humid zone                           | 8.06%  | 0.48%  |
| IV7   | Eastern edge of the Himalayas tropical humid zone                         | 85.42% | 7.10%  |
| V1    | Xiliaohe River temperate semi-arid zone                                   | 22.65% | 1.97%  |
| V2    | Eastern Inner Mongolia Plateau temperate semi-arid zone                   | 20.10% | 3.19%  |
| V3    | Ordos Plateau and surrounding mountains temperate semi-arid zone          | 32.60% | 3.60%  |
| VI1   | Western Inner Mongolia Plateau temperate arid Zone                        | 41.65% | 5.88%  |
| VI2   | Northern Xinjiang temperate arid semi-arid zone                           | 32.22% | 4.20%  |
| VI3   | Southern Xinjiang temperate warm temperate arid zone                      | 53.46% | 4.21%  |
| VII1  | Kunlun Mountains alpine arid zone                                         | 87.63% | 39.79% |
| VII2  | Qaidam and Qilian Mountains alpine arid semi-arid zone                    | 78.98% | 18.54% |
| VII3  | Qiangtang Plateau alpine arid zone                                        | 92.87% | 41.07% |
| VII4  | East Tibet and south Qinghai alpine semi-humid zone                       | 86.54% | 29.66% |
| VII5  | Southern Tibetan alpine semi-humid semi-arid zone                         | 60.71% | 9.96%  |
| VIII1 | South China Sea islands tropical humid zone                               | —      | —      |
