# Supplementary material for: A Protected Area Connectivity Evaluation and Strategy Development Framework for Post-2020 Biodiversity Conservation
Source: MDPI journal article supplement (doi:10.3390/land11101670), 2022-09-27
Supplement: s1 [file s1]

Archive with 1 entries (1 files):
- land-1925217-supplementary.pdf
